# Supplementary material for: Synergistic mechanism between laurel alkanolamide and hydrophobically associating polyacrylamide in solutions with high salinity
Source: Royal Society of Chemistry journal article supplement (doi:10.1039/c4ra14884c), 2015-01-01
Supplement: c4ra14884c1.pdf [file c4ra14884c1.pdf]

## Supporting Information

### **Synergistic mechanism between laurel alkanolamide and hydrophobically associating polyacrylamide in solutions with high salinity**

**Quanhua Deng<sup>a</sup>, Haiping Li<sup>b</sup>, Ying Li<sup>a\*</sup>, Xulong Cao<sup>c</sup>, Yong Yang<sup>c</sup>,  
Xinwang Song<sup>c</sup>**

*<sup>a</sup>Key Laboratory for Colloid and Interface Chemistry of Education  
Ministry, Shandong University, Jinan 250100, P.R. China;*

*<sup>b</sup>National Engineering Technology Research Center for Colloidal  
Materials, Shandong University, Jinan 250100, P.R. China;*

*<sup>c</sup>Geological Scientific Research Institute, Shengli Oilfield, Dongying  
257015, P.R. China.*

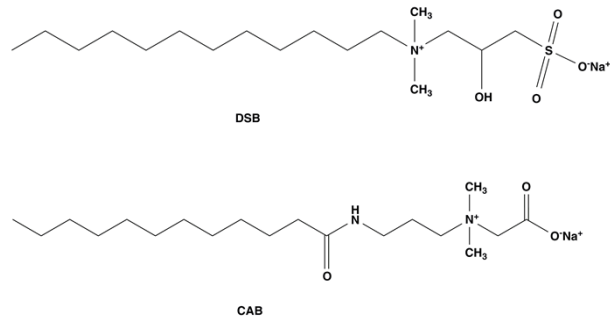

**Fig. S1** Chemical structures of DSB and CAB.

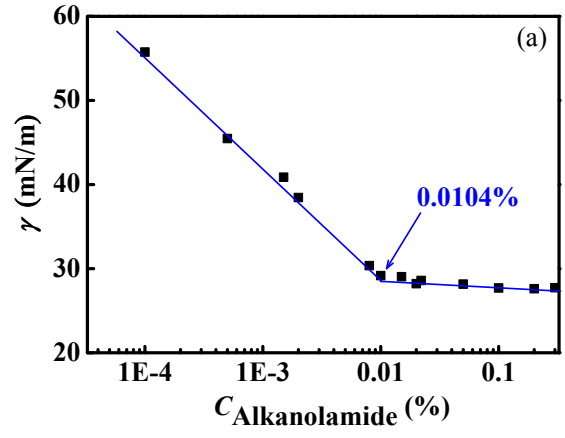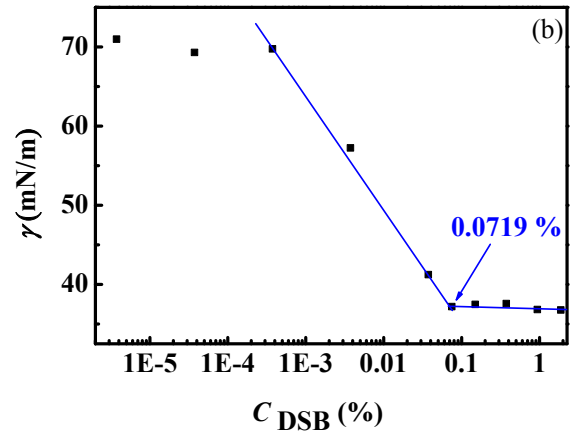

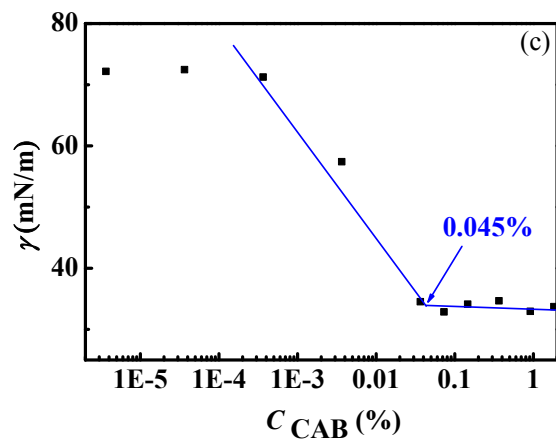

**Fig. S2** Surface tension of (a) laurel alkanolamide, (b) DSB and (c) CAB solutions.

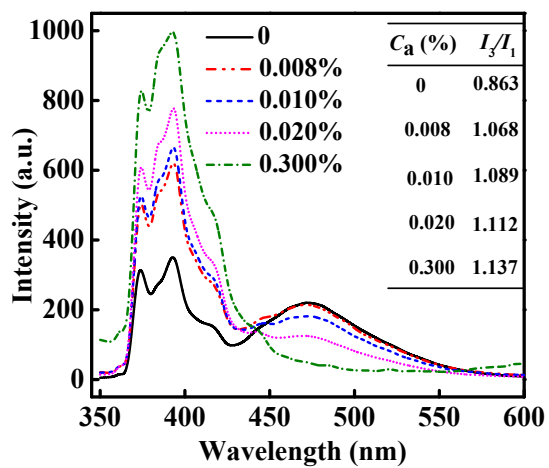

**Fig. S3** Fluorescence spectra of 0.1% H/L solutions at various concentrations of alkanolamide.

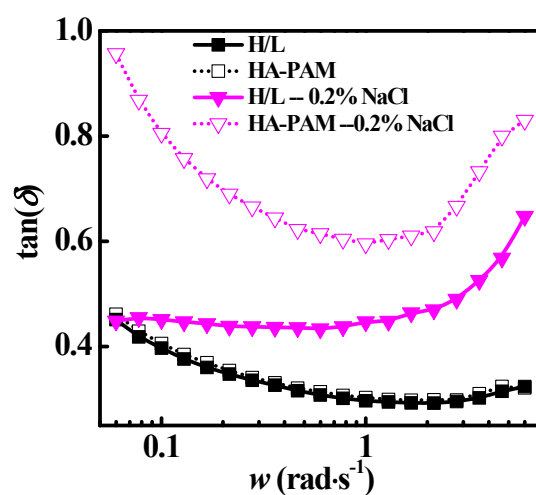

**Fig. S4**  $\tan(\delta)$  of HA-PAM and H/L solutions with and without 0.2% NaCl.

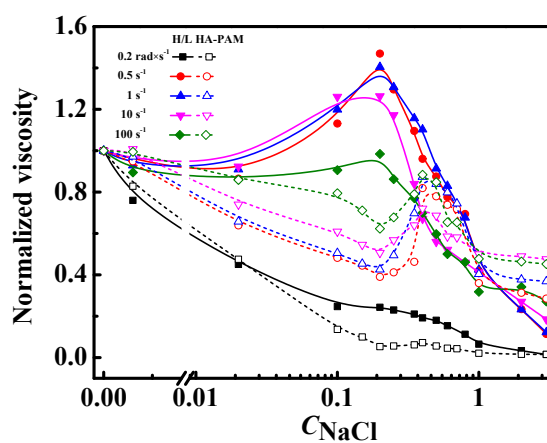

**Fig. S5** Variation of normalized viscosity by the initial viscosity with NaCl concentration<sup>1</sup> at various shear rates for 0.1% H/L solutions with 0.02% laurel alkanolamide and 0.1% HA-PAM solutions.

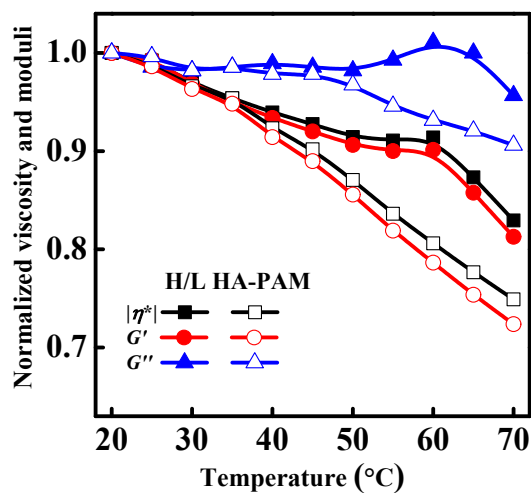

**Fig. S6** Normalized viscosity and moduli by initial values for 0.1% HA-PAM and H/L solutions.

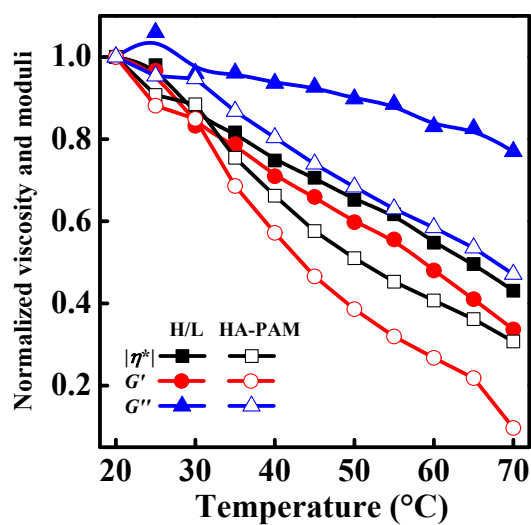

**Fig. S7** Normalized viscosity and moduli by initial values for 0.1% HA-PAM and H/L solutions at NaCl concentration of 0.2%.

1. Q. Deng, H. Li, Y. Li, X. Cao, Y. Yang and X. Song, *Aust. J. Chem.*, 2014, **67** (10), 1396-1402.
